# Supplementary material for: The Association between Adult Weight Gain and Insulin Resistance at Middle Age: Mediation by Visceral Fat and Liver Fat
Source: J Clin Med. 2019 Sep 28;8(10):1559. doi: 10.3390/jcm8101559 (PMC6832997; doi:10.3390/jcm8101559)
Supplement: Supplementary file 1 [file jcm-08-01559-s001.pdf]

**Table S1.** Relative change with 95% confidence intervals in measures of insulin resistance and sensitivity for categories of absolute weight change (in kilograms) during adulthood, compared with weight maintenance (N=1758)

| <u>Absolute adult weight change between age 20 and middle age (in kilograms)</u> |            |         |            |         |            |         |            |
|----------------------------------------------------------------------------------|------------|---------|------------|---------|------------|---------|------------|
|                                                                                  | Proportion | Model 1 |            | Model 2 |            | Model 3 |            |
|                                                                                  |            | Ratio   | 95% CI     | Ratio   | 95% CI     | Ratio   | 95% CI     |
| <i>HOMA-IR</i>                                                                   |            |         |            |         |            |         |            |
| Loss of >5 kg                                                                    | 2.2%       | 1.08    | 0.84; 1.40 | 1.14    | 0.88; 1.50 | 0.95    | 0.72; 1.25 |
| -5 kg - +5 kg (ref)                                                              | 17.7%      | 1       |            | 1       |            | 1       |            |
| 5 kg – 15 kg                                                                     | 42.3%      | 1.45    | 1.26; 1.67 | 1.46    | 1.27; 1.67 | 1.49    | 1.30; 1.71 |
| 15 kg – 30 kg                                                                    | 30.1%      | 2.03    | 1.78; 2.32 | 1.96    | 1.73; 2.23 | 2.04    | 1.80; 2.32 |
| >30 kg                                                                           | 7.7%       | 3.13    | 2.69; 3.64 | 3.00    | 2.59; 3.47 | 3.12    | 2.70; 3.59 |
| <i>Matsuda ISI</i>                                                               |            |         |            |         |            |         |            |
| Loss of >5 kg                                                                    | 2.2%       | 1.04    | 0.83; 1.30 | 0.99    | 0.80; 1.23 | 1.16    | 0.92; 1.45 |
| -5 kg - +5 kg (ref)                                                              | 17.7%      | 1       |            | 1       |            | 1       |            |
| 5 kg – 15 kg                                                                     | 42.3%      | 0.71    | 0.64; 0.79 | 0.71    | 0.64; 0.79 | 0.70    | 0.63; 0.77 |
| 15 kg – 30 kg                                                                    | 30.1%      | 0.52    | 0.47; 0.58 | 0.54    | 0.49; 0.60 | 0.53    | 0.48; 0.58 |
| >30 kg                                                                           | 7.7%       | 0.35    | 0.31; 0.39 | 0.36    | 0.32; 0.41 | 0.35    | 0.31; 0.39 |

Results were based on analyses weighted towards the BMI distribution of the general population and were derived from beta coefficients with 95% confidence intervals from linear regression analyses and expressed as ratios of outcome measures compared with weight maintenance during adulthood. Abbreviations: CI, confidence interval; HOMA-IR, homeostatic model assessment insulin resistance; Matsuda ISI, Matsuda insulin sensitivity index; ref, reference. Model 1: adjusted for sex and age; 2: additionally adjusted for ethnicity, education, smoking, alcohol consumption, physical activity and family history of diabetes; 3: additionally adjusted for BMI at age 20.

**Table S2.** Association between of adult weight change (per 10% change) and measures of insulin resistance and sensitivity, for complete study population and for men and women separately

|                | <b>All (N=1758)</b> |               | <b>Men (n=913)</b> |               | <b>Women (n=845)</b> |               |
|----------------|---------------------|---------------|--------------------|---------------|----------------------|---------------|
|                | <b>Beta</b>         | <b>95% CI</b> | <b>Beta</b>        | <b>95% CI</b> | <b>Beta</b>          | <b>95% CI</b> |
| <b>HOMA-IR</b> |                     |               |                    |               |                      |               |
| Model 1        | 1.21                | 1.18; 1.24    | 1.21               | 1.17; 1.26    | 1.21                 | 1.16; 1.25    |
| Model 2        | 1.20                | 1.17; 1.23    | 1.20               | 1.16; 1.24    | 1.20                 | 1.15; 1.24    |

|                    |      |            |      |            |      |            |
|--------------------|------|------------|------|------------|------|------------|
| Model 3            | 1.25 | 1.21; 1.28 | 1.28 | 1.24; 1.33 | 1.22 | 1.18; 1.27 |
| <b>Matsuda ISI</b> |      |            |      |            |      |            |
| Model 1            | 0.83 | 0.81; 0.85 | 0.83 | 0.80; 0.86 | 0.83 | 0.81; 0.86 |
| Model 2            | 0.84 | 0.82; 0.86 | 0.85 | 0.82; 0.87 | 0.84 | 0.82; 0.86 |
| Model 3            | 0.81 | 0.80; 0.83 | 0.80 | 0.77; 0.82 | 0.83 | 0.80; 0.85 |

Results were based on analyses weighted towards the BMI distribution of the general population and were derived from beta coefficients with 95% confidence intervals from linear regression. Abbreviations: CI, confidence interval; HOMA-IR, homeostatic model assessment insulin resistance; Matsuda ISI, Matsuda insulin sensitivity index. Model 1: adjusted for sex and age; 2: additionally adjusted for ethnicity, education, smoking, alcohol consumption, physical activity and family history of diabetes; 3: additionally adjusted for BMI at age 20.

|                            | Total body fat    | Visceral adipose tissue | Hepatic triglyceride content |
|----------------------------|-------------------|-------------------------|------------------------------|
|                            | P for interaction | P for interaction       | P for interaction            |
| <i>Adult weight change</i> |                   |                         |                              |
| HOMA-IR                    | 0.247             | 0.684                   | 0.458                        |
| Matsuda ISI                | 0.260             | 0.279                   | 0.408                        |

Results were based on analyses weighted towards the BMI distribution of the general population (N=1758), adjusted for sex, age, BMI at age 20, ethnicity, education, smoking, alcohol consumption, physical activity and family history of diabetes. Abbreviations: HOMA-IR, homeostatic model assessment insulin resistance; Matsuda ISI, Matsuda insulin sensitivity index.

[illegible]

|                    |      |            |      |            |      |            |      |            |      |            |      |            |      |            |
|--------------------|------|------------|------|------------|------|------------|------|------------|------|------------|------|------------|------|------------|
| <-5.0%             | 0.73 | 0.47; 1.12 | 0.82 | 0.54; 1.25 | 0.83 | 0.55; 1.26 | 0.86 | 0.57; 1.31 | 0.76 | 0.49; 1.17 | 0.82 | 0.54; 1.25 | 0.85 | 0.56; 1.29 |
| -5% - +5% (ref)    | 1    |            | 1    |            | 1    |            | 1    |            | 1    |            | 1    |            | 1    |            |
| +5% - 25%          | 1.47 | 1.30; 1.67 | 1.23 | 1.07; 1.42 | 1.13 | 0.99; 1.29 | 1.08 | 0.93; 1.24 | 1.29 | 1.14; 1.47 | 1.17 | 1.02; 1.35 | 1.07 | 0.93; 1.23 |
| +25% - +50%        | 2.28 | 2.01; 2.59 | 1.58 | 1.31; 1.91 | 1.47 | 1.25; 1.73 | 1.32 | 1.09; 1.59 | 1.78 | 1.55; 2.06 | 1.45 | 1.21; 1.74 | 1.28 | 1.06; 1.54 |
| >+50%              | 3.22 | 2.76; 3.77 | 1.87 | 1.48; 2.36 | 1.76 | 1.44; 2.16 | 1.49 | 1.17; 1.89 | 2.17 | 1.82; 2.58 | 1.59 | 1.27; 2.00 | 1.38 | 1.09; 1.74 |
| <i>Matsuda ISI</i> |      |            |      |            |      |            |      |            |      |            |      |            |      |            |
| ≤5.0%              | 1.40 | 1.05; 1.86 | 1.25 | 0.94; 1.66 | 1.24 | 0.93; 1.66 | 1.19 | 0.89; 1.59 | 1.33 | 1.00; 1.77 | 1.25 | 0.94; 1.65 | 1.21 | 0.91; 1.61 |
| -5% - +5% (ref)    | 1    |            | 1    |            | 1    |            | 1    |            | 1    |            | 1    |            | 1    |            |
| +5% - 25%          | 0.71 | 0.64; 0.79 | 0.84 | 0.75; 0.95 | 0.91 | 0.81; 1.02 | 0.95 | 0.85; 1.07 | 0.82 | 0.73; 0.91 | 0.89 | 0.80; 1.00 | 0.96 | 0.86; 1.08 |
| +25% - +50%        | 0.47 | 0.42; 0.52 | 0.67 | 0.57; 0.78 | 0.70 | 0.61; 0.81 | 0.79 | 0.67; 0.92 | 0.61 | 0.54; 0.69 | 0.73 | 0.63; 0.86 | 0.81 | 0.69; 0.95 |
| >+50%              | 0.34 | 0.30; 0.39 | 0.57 | 0.47; 0.70 | 0.59 | 0.50; 0.71 | 0.70 | 0.57; 0.87 | 0.52 | 0.44; 0.60 | 0.68 | 0.56; 0.83 | 0.77 | 0.63; 0.93 |

**Table S5.** Mediation of the association between adult weight change and insulin resistance by total body fat, visceral adipose tissue and hepatic triglyceride content in men (n=913)

[illegible]

|             |      |            |      |            |      |            |      |            |      |            |      |            |      |            |
|-------------|------|------------|------|------------|------|------------|------|------------|------|------------|------|------------|------|------------|
| +5% - 25%   | 0.73 | 0.61; 0.87 | 0.92 | 0.76; 1.12 | 0.97 | 0.78; 1.20 | 1.08 | 0.87; 1.33 | 0.82 | 0.68; 0.98 | 0.95 | 0.78; 1.14 | 1.06 | 0.87; 1.29 |
| +25% - +50% | 0.47 | 0.39; 0.56 | 0.76 | 0.59; 0.98 | 0.71 | 0.56; 0.90 | 0.92 | 0.70; 1.20 | 0.60 | 0.49; 0.73 | 0.81 | 0.64; 1.03 | 0.92 | 0.72; 1.19 |
| >+50%       | 0.30 | 0.24; 0.39 | 0.67 | 0.47; 0.95 | 0.52 | 0.38; 0.72 | 0.82 | 0.57; 1.19 | 0.45 | 0.34; 0.58 | 0.73 | 0.53; 1.01 | 0.85 | 0.61; 1.18 |

Results were based on analyses weighted towards the BMI distribution of the general population and were derived from beta coefficients with 95% confidence intervals from linear regression analyses and expressed as ratios outcome measures compared with weight maintenance during adulthood. CI, confidence interval; HOMA-IR, homeostatic model assessment insulin resistance; Matsuda ISI, Matsuda insulin sensitivity index; TBF, total body fat; VAT, visceral adipose tissue; HTGC, hepatic triglyceride content; ref, reference. Model 3: adjusted for age and BMI at age 20, ethnicity, education, smoking, alcohol consumption, physical activity and family history of diabetes. ‘+’ indicates that the mediator(s) was/were added to the starting model (model 3).

**Table S6.** Mediation of the association between adult weight change and insulin resistance by total body fat, visceral adipose tissue and hepatic triglyceride content in women (n=845)

|                    | Starting model<br>(model 3) |            | + TBF |            | + VAT |            | + TBF, VAT |            | + HTGC |            | + TBF, HTGC |            | + TBF, VAT and<br>HTGC |            |
|--------------------|-----------------------------|------------|-------|------------|-------|------------|------------|------------|--------|------------|-------------|------------|------------------------|------------|
|                    | Ratio                       | 95% CI     | Ratio | 95% CI     | Ratio | 95% CI     | Ratio      | 95% CI     | Ratio  | 95% CI     | Ratio       | 95% CI     | Ratio                  | 95% CI     |
| <i>HOMA-IR</i>     |                             |            |       |            |       |            |            |            |        |            |             |            |                        |            |
| <-5.0%             | 0.67                        | 0.39; 1.16 | 0.73  | 0.43; 1.24 | 0.81  | 0.48; 1.38 | 0.82       | 0.48; 1.39 | 0.68   | 0.39; 1.19 | 0.71        | 0.42; 1.22 | 0.78                   | 0.46; 1.31 |
| -5% - +5% (ref)    | 1.00                        |            | 1.00  |            | 1.00  |            | 1.00       |            | 1.00   |            | 1.00        |            | 1.00                   |            |
| +5% - 25%          | 1.43                        | 1.20; 1.70 | 1.24  | 1.02; 1.50 | 1.14  | 0.96; 1.36 | 1.13       | 0.94; 1.36 | 1.23   | 1.03; 1.47 | 1.15        | 0.95; 1.39 | 1.09                   | 0.91; 1.31 |
| +25% - +50%        | 2.15                        | 1.80; 2.55 | 1.58  | 1.22; 2.05 | 1.41  | 1.13; 1.76 | 1.38       | 1.06; 1.78 | 1.67   | 1.38; 2.02 | 1.43        | 1.11; 1.85 | 1.32                   | 1.02; 1.71 |
| >+50%              | 2.90                        | 2.39; 3.52 | 1.89  | 1.39; 2.58 | 1.62  | 1.26; 2.09 | 1.56       | 1.15; 2.12 | 1.93   | 1.56; 2.39 | 1.57        | 1.16; 2.11 | 1.42                   | 1.05; 1.91 |
| <i>Matsuda ISI</i> |                             |            |       |            |       |            |            |            |        |            |             |            |                        |            |
| ≤5.0%              | 1.39                        | 0.98; 1.98 | 1.30  | 0.91; 1.84 | 1.16  | 0.81; 1.66 | 1.16       | 0.81; 1.65 | 1.37   | 0.96; 1.96 | 1.32        | 0.93; 1.88 | 1.22                   | 0.86; 1.73 |
| -5% - +5% (ref)    | 1.00                        |            | 1.00  |            | 1.00  |            | 1.00       |            | 1.00   |            | 1.00        |            | 1.00                   |            |
| +5% - 25%          | 0.72                        | 0.63; 0.81 | 0.82  | 0.71; 0.95 | 0.89  | 0.78; 1.01 | 0.90       | 0.78; 1.03 | 0.84   | 0.73; 0.95 | 0.89        | 0.77; 1.02 | 0.93                   | 0.81; 1.07 |
| +25% - +50%        | 0.48                        | 0.42; 0.55 | 0.64  | 0.52; 0.79 | 0.72  | 0.60; 0.86 | 0.73       | 0.60; 0.91 | 0.63   | 0.54; 0.74 | 0.72        | 0.58; 0.88 | 0.77                   | 0.63; 0.94 |
| >+50%              | 0.37                        | 0.31; 0.43 | 0.55  | 0.42; 0.71 | 0.64  | 0.52; 0.79 | 0.66       | 0.51; 0.85 | 0.57   | 0.47; 0.68 | 0.67        | 0.53; 0.86 | 0.74                   | 0.58; 0.94 |

Results were based on analyses weighted towards the BMI distribution of the general population and were derived from beta coefficients with 95% confidence intervals from linear regression analyses and expressed as ratios of outcome measures compared with weight maintenance during adulthood. CI, confidence interval; HOMA-IR, homeostatic model assessment insulin resistance; Matsuda ISI, Matsuda insulin sensitivity index; TBF, total body fat; VAT, visceral adipose tissue; HTGC, hepatic triglyceride content; ref, reference. Model 3: adjusted for age and BMI at age 20, ethnicity, education, smoking, alcohol consumption, physical activity and family history of diabetes. ‘+’ indicates that the mediator(s) was/were added to the starting model (model 3).
